# Supplementary material for: RNA-seq: An assessment of technical reproducibility and comparison with gene expression arrays
Source: HighWire-hosted journal article supplement (doi:10.1101/gr.079558.108), 2008-06-11
Supplement: SupplementaryCombined.pdf [file SupplementaryCombined.pdf]

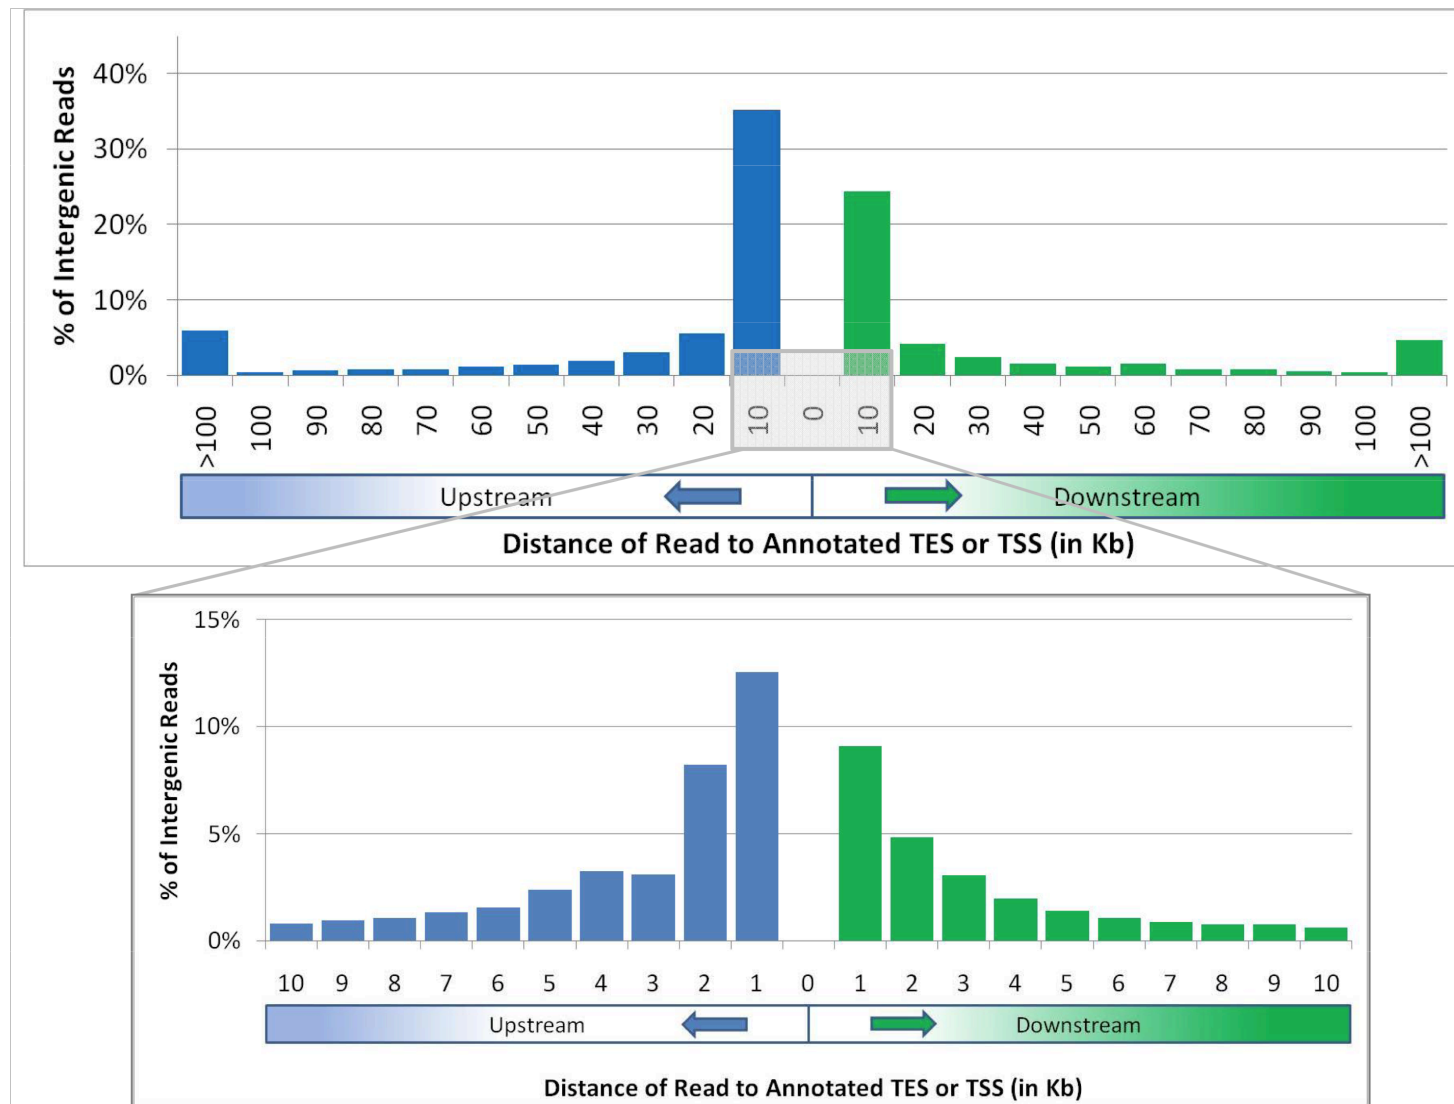

Supplementary Figure 1: Locations of intergenic reads relative to known genes. The histogram shows the location of reads mapped outside genic regions (as annotated by Ensembl v.48) relative to the nearest transcription start site (TSS) or transcription end site (TES) of a gene. In total, 10.6% of such reads are mapped over 100 kb away from either a TSS or a TES, suggesting the existence of novel transcribed regions.

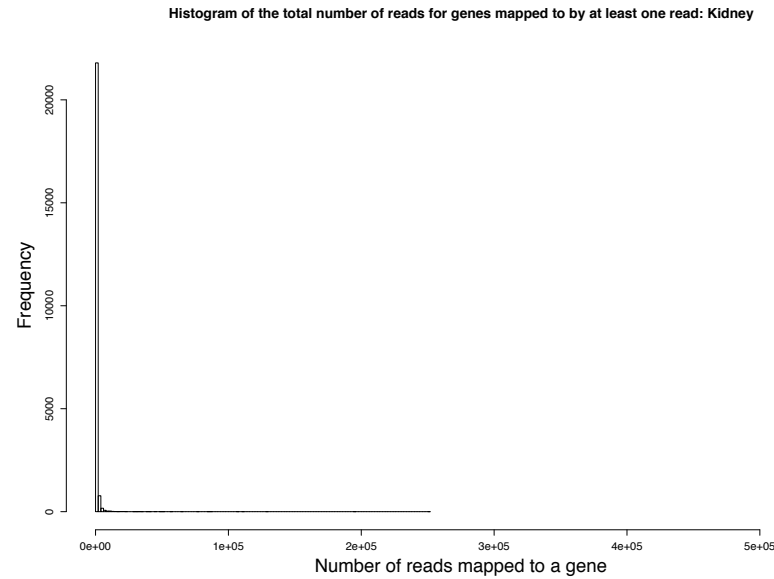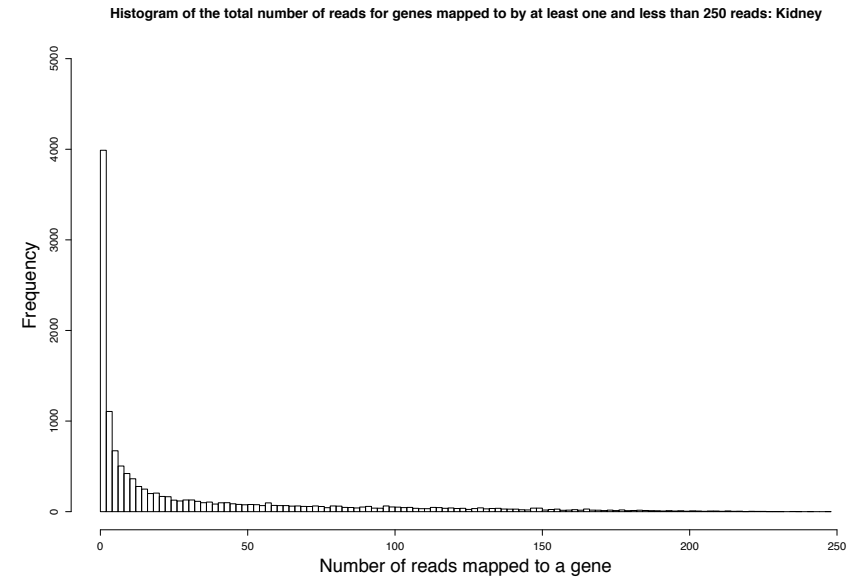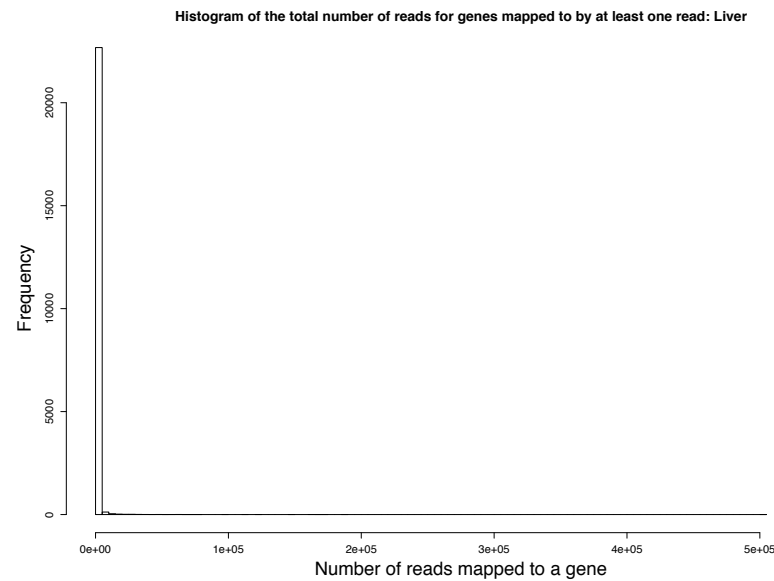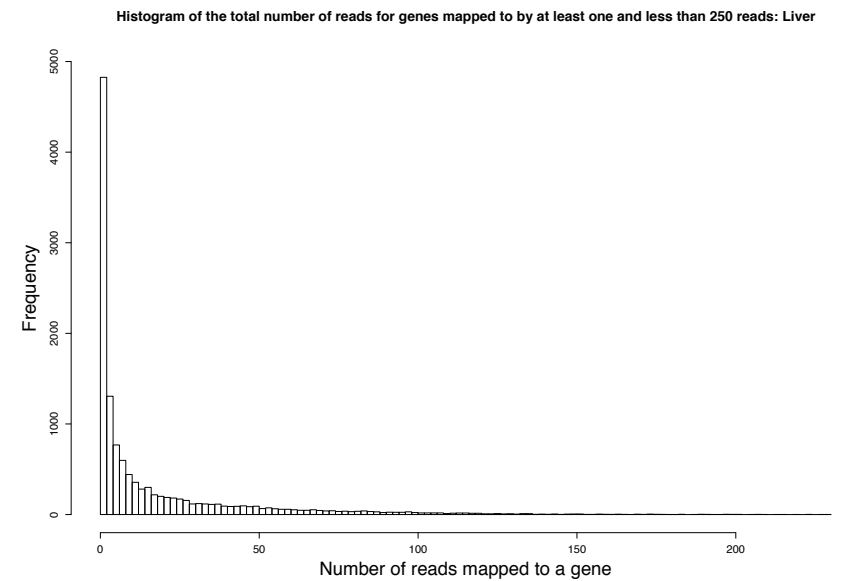

Supplementary Figure 2a: Histograms of the distribution of reads across genes mapped to by at least one read across all 14 lanes of data. In the top row, a histogram of the (total) number of reads mapped to each of these genes for the kidney sample is plotted on the left, and on the right the same plot is shown for all genes that are mapped to by at most 250 reads across all 14 lanes. In the second row, similar plots are shown for the liver sample.

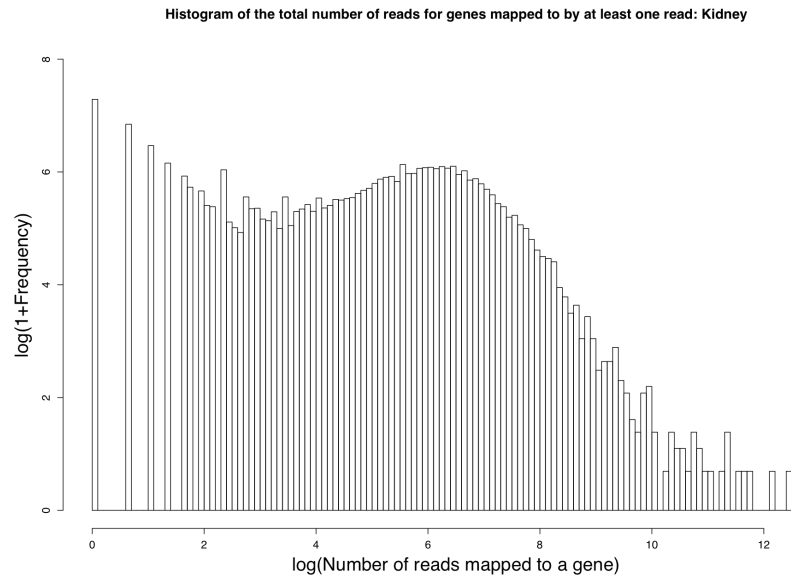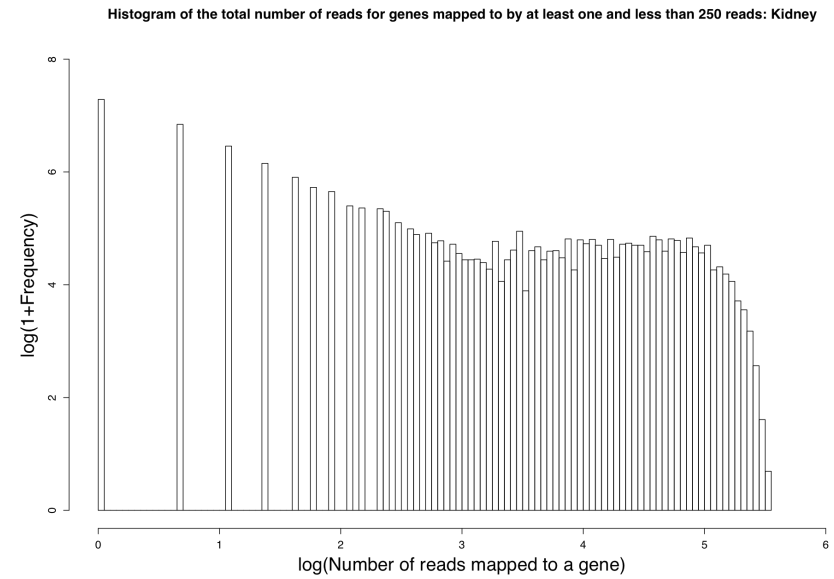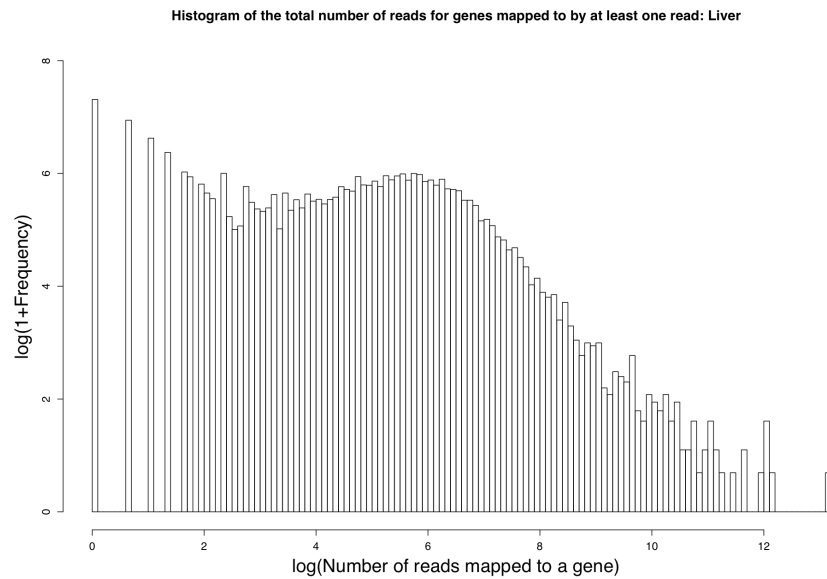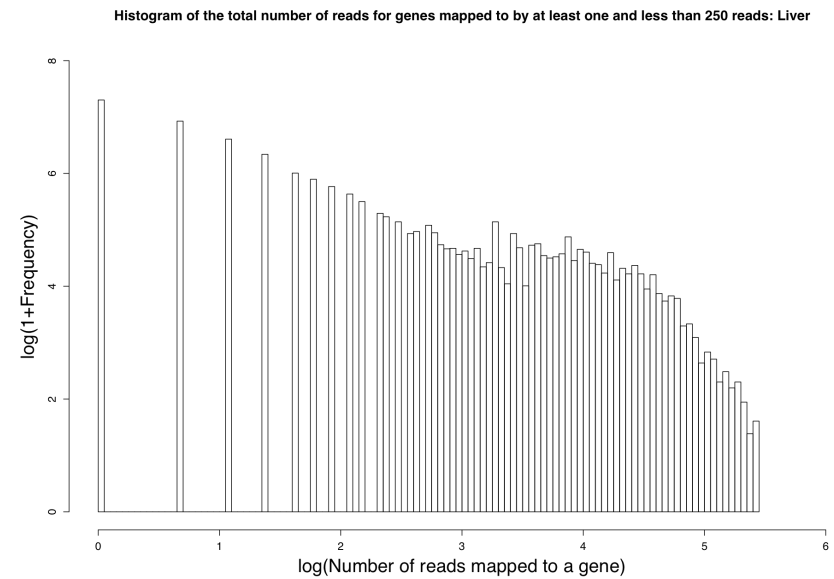

Supplementary Figure 2b: Histograms of the distribution of reads across genes mapped to by at least one read across all 14 lanes of data on the log scale. In the top row, a histogram of the (total) number of reads mapped to each of these genes for the kidney sample is plotted on the left, and on the right the same plot is shown for all genes that are mapped to by at most 250 reads across all 14 lanes. In the second row, similar plots are shown for the liver sample.

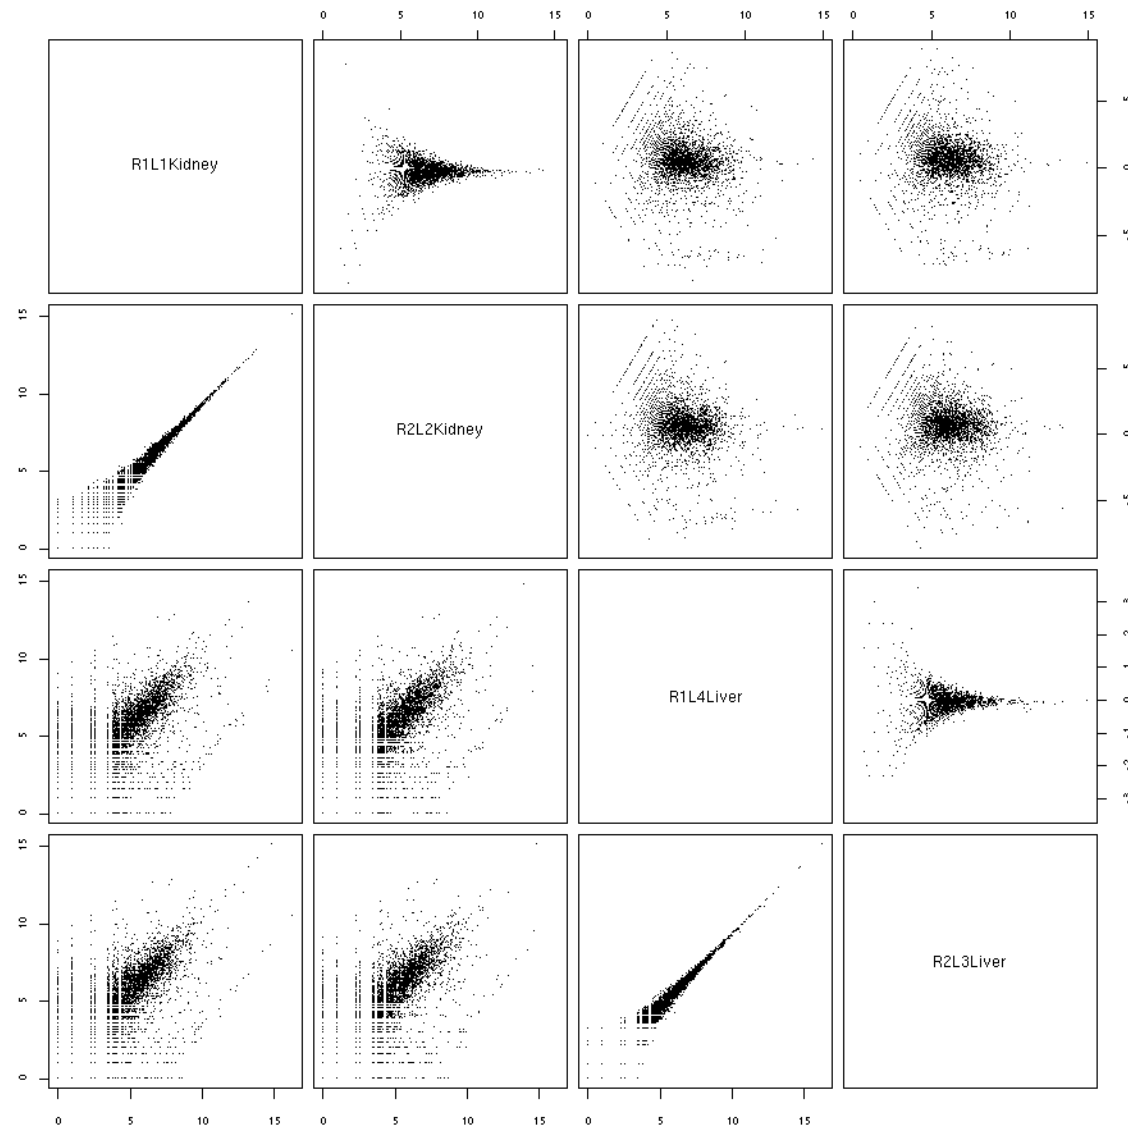

Supplementary Figure 3: Scatterplots and MA plots comparing the number of counts in different lanes. In the first row, the ( $\log_2$ ) counts observed for each gene in Run 1, Lane 1 are plotted on the y-axis, and in the first column, the ( $\log_2$ ) counts for each gene in Run 1, Lane 1 are plotted on the x-axis. Counts for the other samples are plotted similarly and the sample and run/lane that the sample was sequenced in are indicated on the diagonal. In the lower diagonal, scatterplots of the counts associated with each gene are plotted and, in the upper diagonal, MA plots are generated. When the same sample is sequenced in different lanes, a very high correlation can be observed in both the scatter- and MA-plots. To ease interpretation, only genes that were mapped to by at least one read are included.

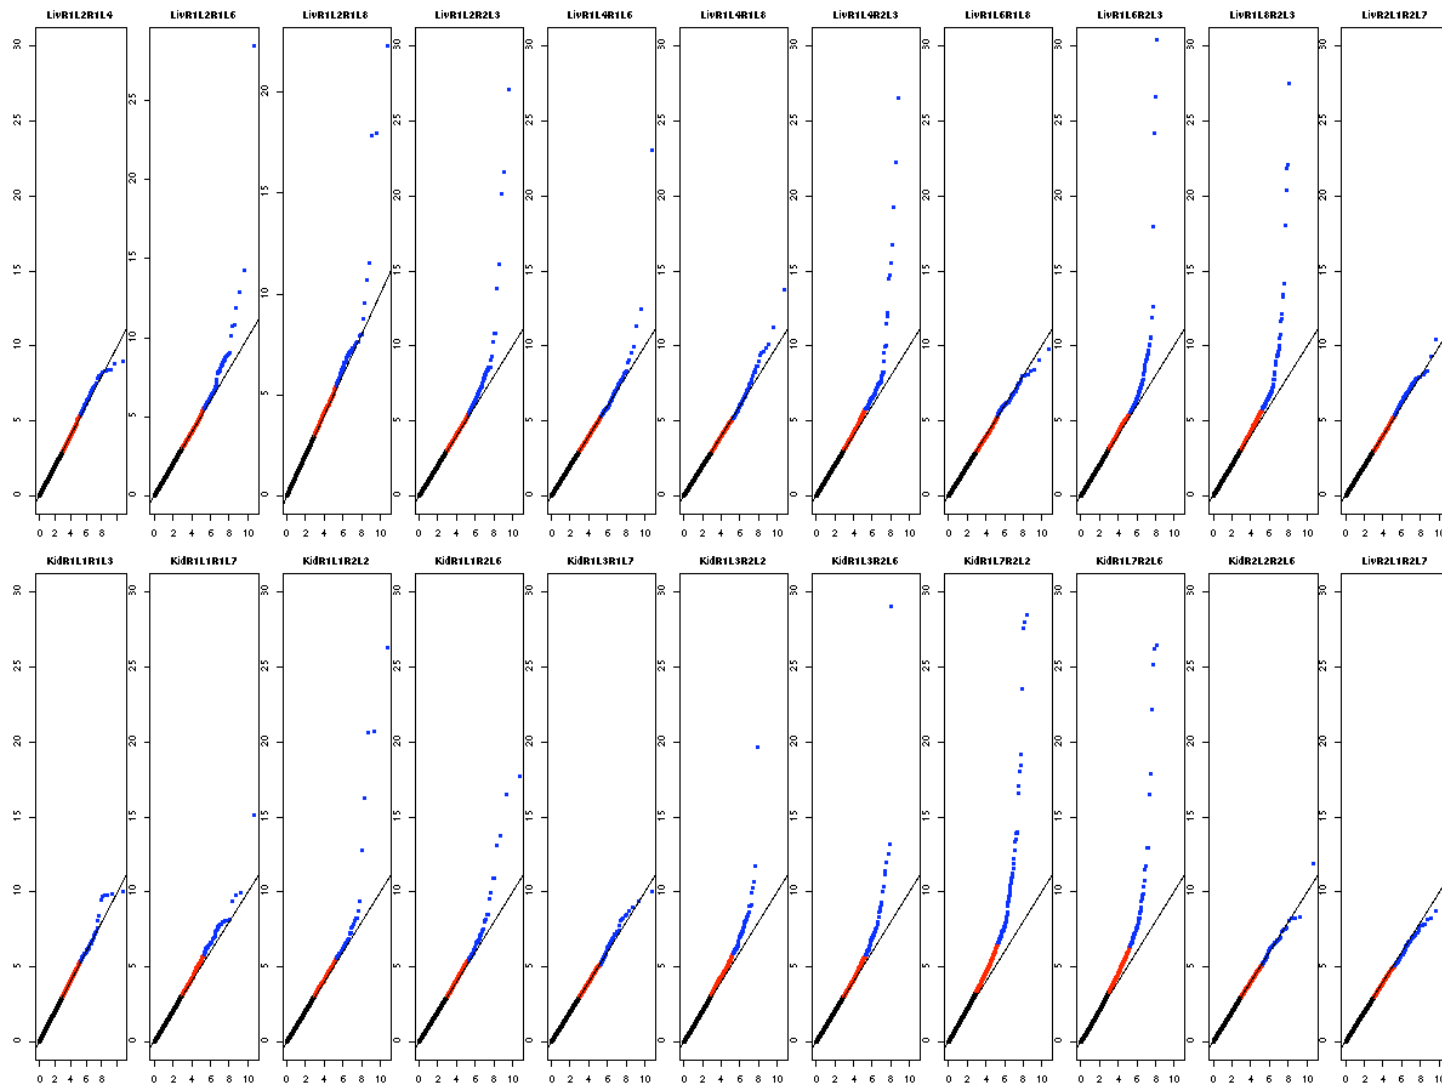

Supplementary Figure 4: *qq*-plots comparing the hypergeometric *p* values for all 22 two-way (lane-vs-lane) comparisons between samples sequenced at the same concentration. In each panel, on the *x* axis the negative log quantiles from a Uniform[0,1] distribution are plotted and on the *y* axis the negative log *p* values obtained in each pairwise comparison are shown. Points in red are above the 95<sup>th</sup> percentile and points in blue are above the 99.5<sup>th</sup> percentile. If the plotted values deviate from the line  $y=x$  (plotted in black), there is evidence of a lane effect. The first row gives the 11 combinations for the liver (the first ten columns show the pairwise comparisons for samples sequenced at a concentration of 3 pM, the last column shows the comparison for samples sequenced at 1.5 pM). The second row gives the 11 combinations for the kidney (again, the first 10 columns show the comparisons for samples sequenced at a concentration of 3 pM and the final column shows the single comparison that is possible for samples sequenced at a concentration of 1.5 pM). The title of each histogram indicates the samples that are being compared.

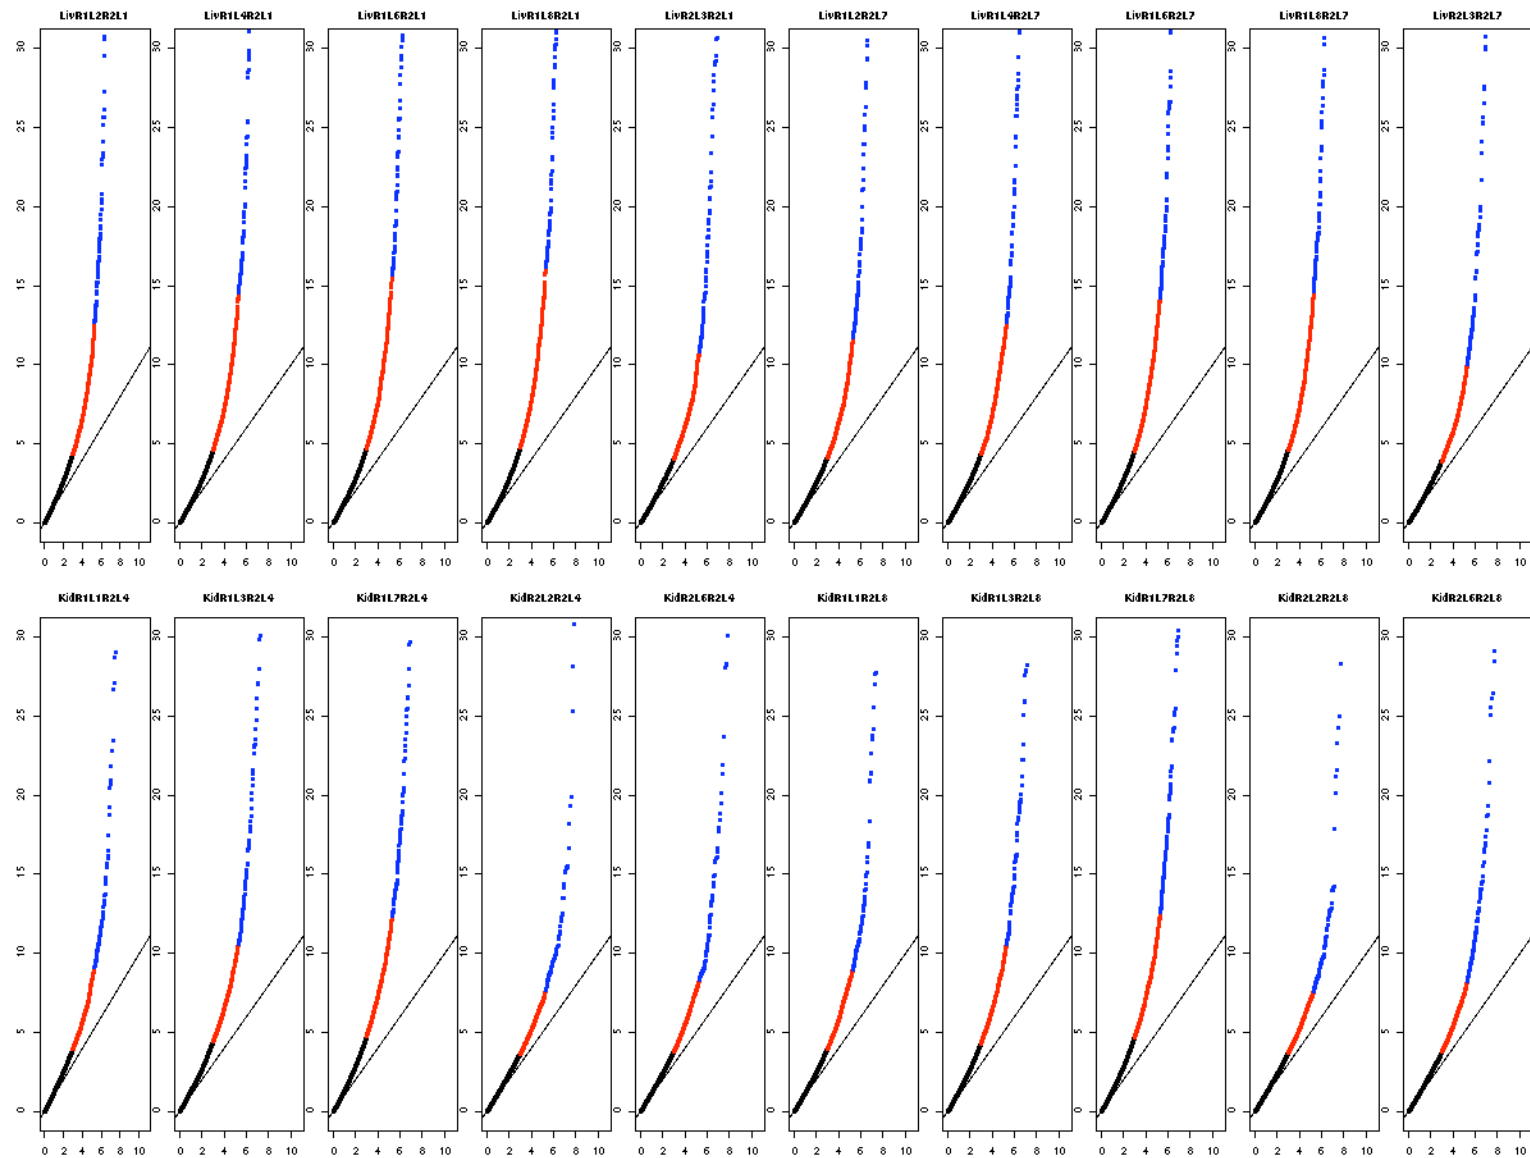

Supplementary Figure 5: *qq*-plots comparing the hypergeometric *p* values for all 20 two-way (lane-vs-lane) comparisons between samples sequenced at different concentrations (i.e., the same sample was sequenced at a concentration of 3 pM in one lane and a concentration of 1.5 pM in another lane). In each panel, on the x axis the negative log quantiles from a Uniform[0,1] distribution are plotted and on the y axis the negative log *p* values obtained in each pairwise comparison are shown. Points in red are above the 95<sup>th</sup> percentile and points in blue are above the 99.5<sup>th</sup> percentile. If the plotted values deviate from the line  $y=x$  (plotted in black), there is evidence of a lane effect. The first row gives the ten combinations for the liver sample and the second row gives the ten combinations for the kidney samples. The title of each histogram indicates the samples that are being compared.

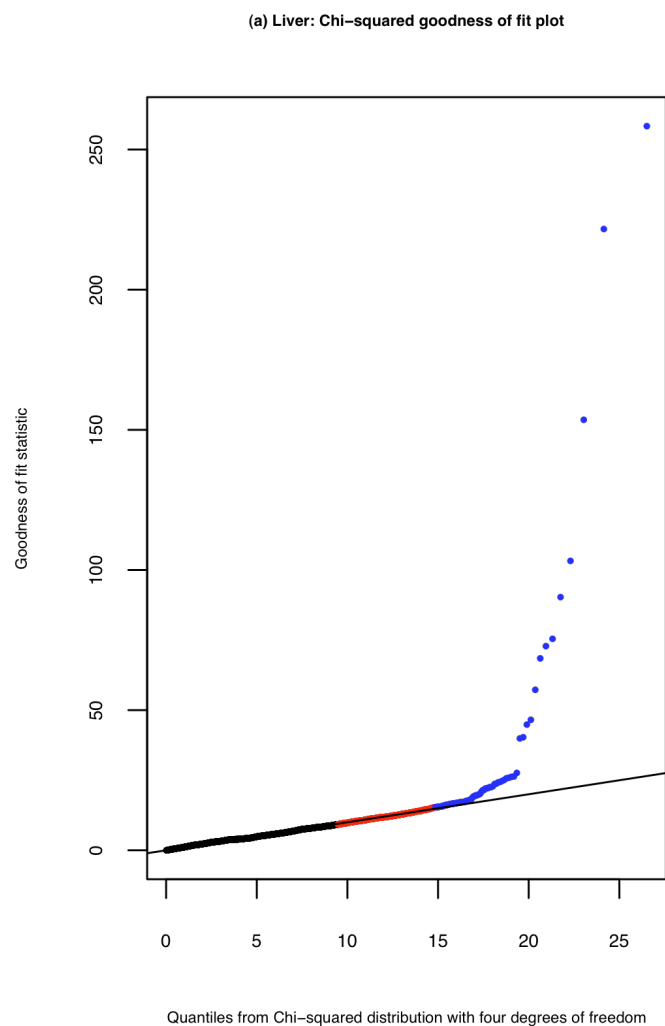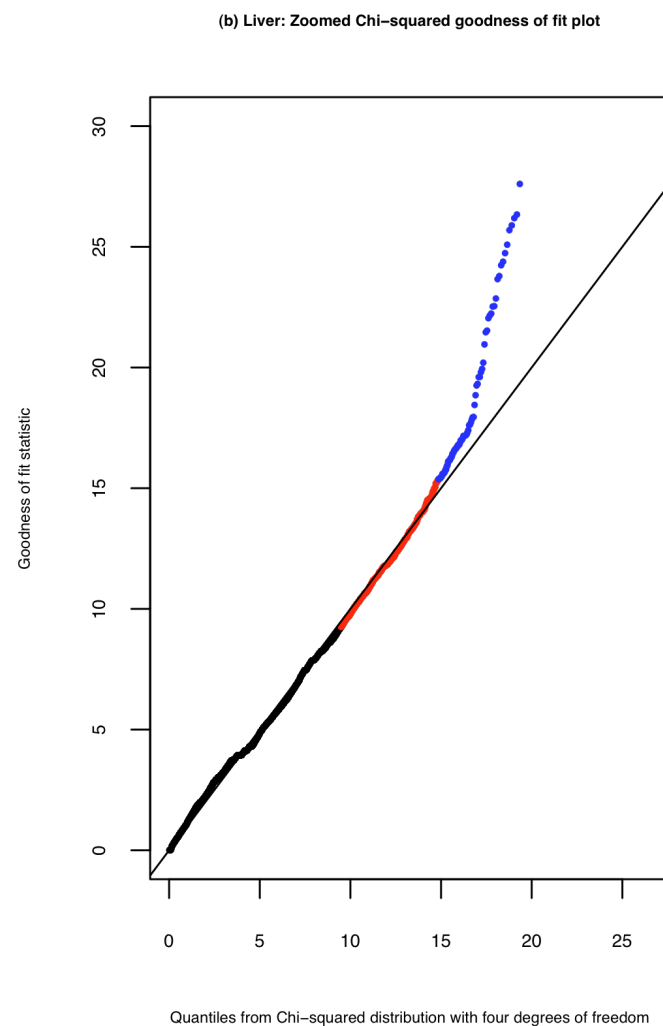

Supplementary Figure 6: Panels (a) and (b) show the *qq*-plot generated (on two different scales) when the goodness-of-fit statistic is used to assess the fit of the Poisson model to the liver data sequenced at a concentration of 3 pM. The goodness-of-fit statistics are plotted on the y axis and the quantiles from a chi-squared distribution with 4 degrees of freedom are shown on the x axis. Points in red are those above the 95th percentile and those in blue are above the 99.5th percentile. If the plotted values deviate from the line  $y=x$  (plotted in black), there is evidence that the Poisson model does not fit the data well. Only a very small number of genes (especially those above the 99.5th percentile) deviate from this line, indicating the Poisson model is appropriate for the overwhelming majority of the data

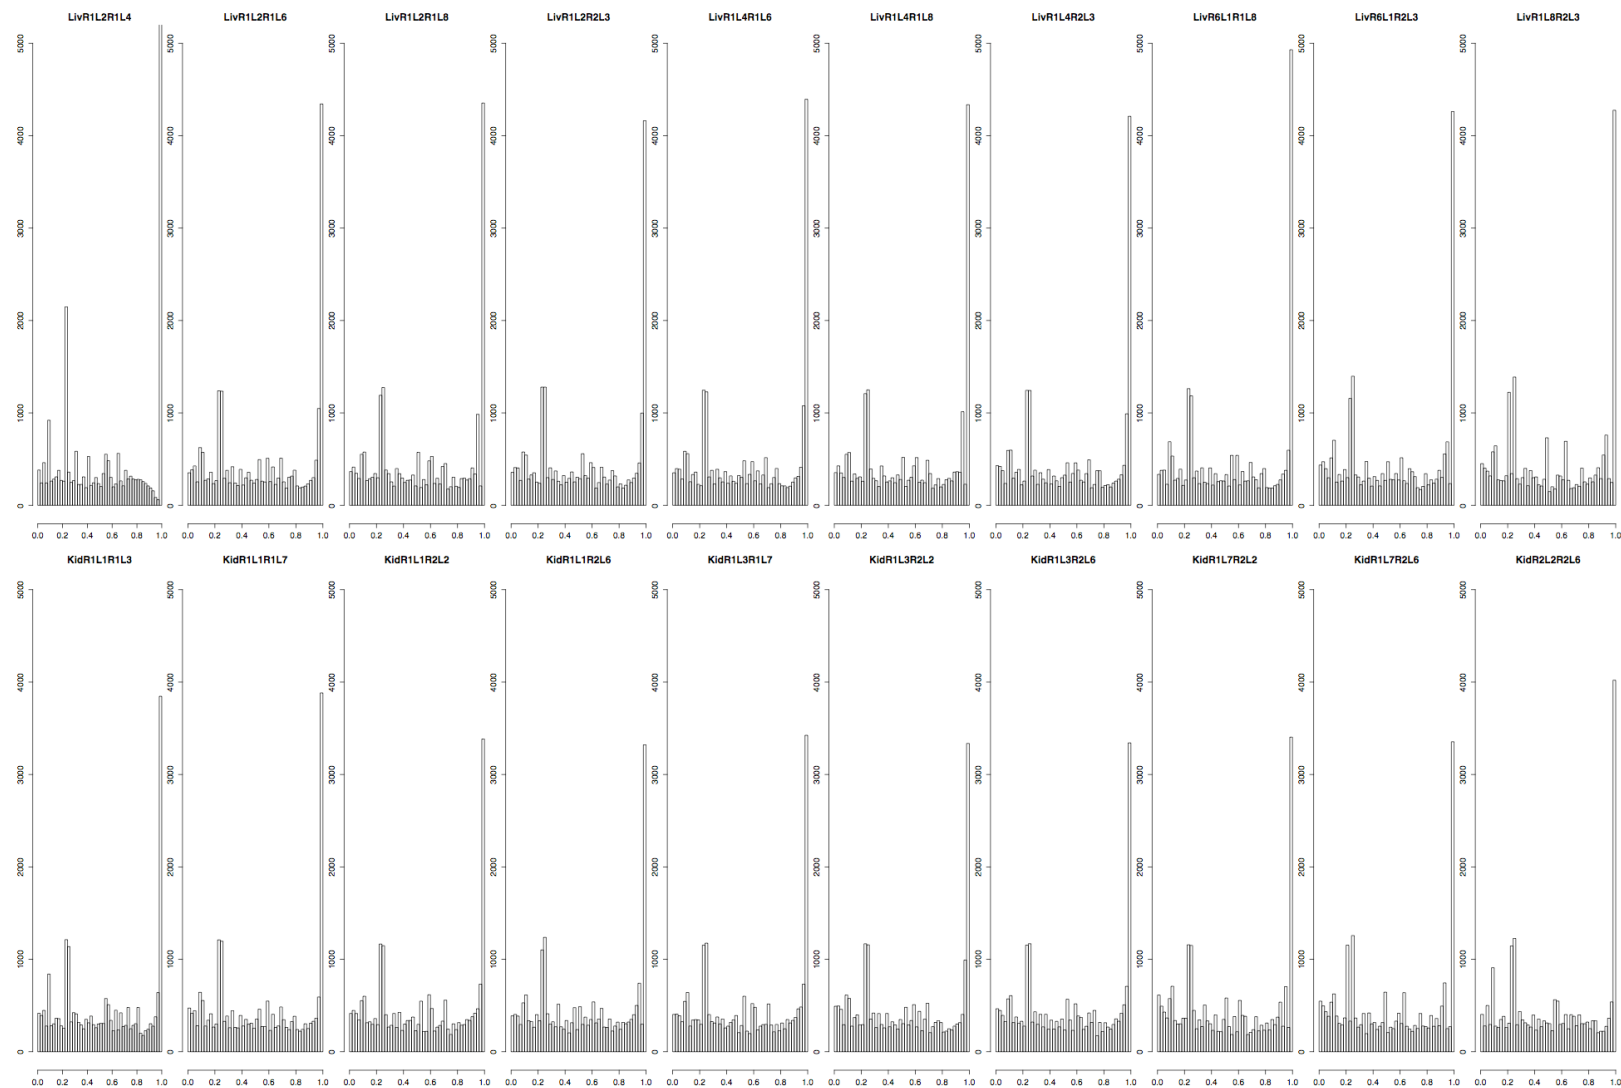

Supplementary Figure 7:  $p$  values for all 20 two-way (lane-vs-lane) comparisons to find differentially expressed genes between lanes used to sequence the same sample. The  $p$  values were determined using the Poisson likelihood ratio statistic. The title of each histogram indicates the samples that are being compared. It is worth noting that a number of spikes appear in the histogram that, at first glance, would indicate a deviation from Uniformity. However, these are due to discretisation of the  $p$  values and, more importantly, an excess of small  $p$  values is not observed - this would be worrying since it would indicate that genes were being (incorrectly) called as differentially expressed when two lanes used to sequence the same sample were compared.

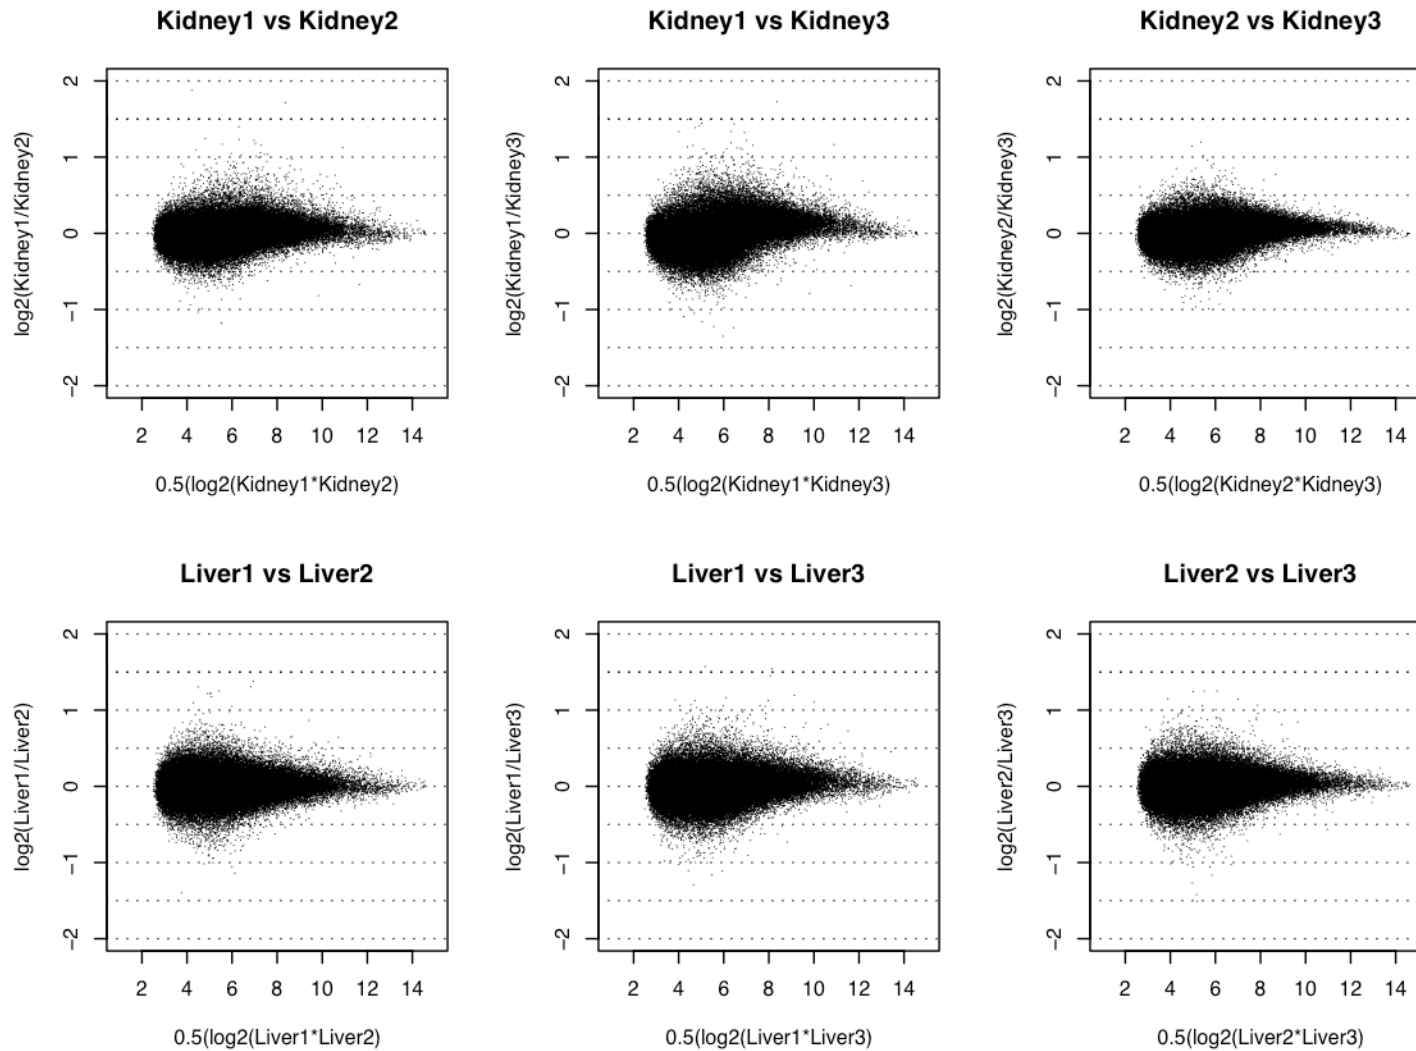

Supplementary Figure 8: MA plots for assessing the performance of the Affymetrix data. MA plots for each of the within tissue array-array comparisons are plotted. Data from the arrays used to measure the expression of the kidney sample are plotted on the top and data from the arrays used to measure the liver sample's expression are plotted on the bottom. For each plot, the log<sub>2</sub> ratio for each probe set and the average log<sub>2</sub> sum are plotted on the y and x axes respectively (the intensity value for each probe set was obtained by applying the RMA algorithm). The plots suggest there are no significant data quality issues in the array data.

| Run 1                       |             |            |             |            |            |             |            |
|-----------------------------|-------------|------------|-------------|------------|------------|-------------|------------|
|                             | L1 - kidney | L2 - liver | L3 - kidney | L4 - liver | L6 - liver | L7 - kidney | L8 - liver |
| Concentration (pM)          | 3           | 3          | 3           | 3          | 3          | 3           | 3          |
| Number of reads             | 13017169    | 14003322   | 13401343    | 14230879   | 13525355   | 12848201    | 13096715   |
| Number of mapped reads      | 5025044     | 5142214    | 5199295     | 5167290    | 4997324    | 4901266     | 4822319    |
| Mapped to chrs 1-24         | 3261380     | 3460175    | 3369521     | 3480325    | 3363455    | 3179248     | 3249417    |
| Mapped within Ensembl Genes | 2706150     | 2847704    | 2792026     | 2861877    | 2761468    | 2630987     | 2668148    |
| Mapped within Ensembl Exons | 1926217     | 1815816    | 1981182     | 1821860    | 1752042    | 1861126     | 1692041    |

  

| Run 2                       |            |             |            |             |             |            |             |
|-----------------------------|------------|-------------|------------|-------------|-------------|------------|-------------|
|                             | L1 - liver | L2 - kidney | L3 - liver | L4 - kidney | L6 - kidney | L7 - liver | L8 - kidney |
| Concentration (pM)          | 1.5        | 3           | 3          | 1.5         | 3           | 1.5        | 1.5         |
| Number of reads             | 9096595    | 13687929    | 14761931   | 8843158     | 13449864    | 9341101    | 8449276     |
| Number of mapped reads      | 4138533    | 5293547     | 5320141    | 4394988     | 5422895     | 4437111    | 4266893     |
| Mapped to chrs 1-24         | 2794909    | 3456114     | 3591760    | 2885222     | 3533100     | 2989819    | 2799046     |
| Mapped within Ensembl Genes | 2328896    | 2875214     | 2959436    | 2416834     | 2938079     | 2488832    | 2345160     |
| Mapped within Ensembl Exons | 1532142    | 2055876     | 1896001    | 1751854     | 2096458     | 1634684    | 1701056     |

Supplementary Table 1: Summary of the number of reads mapped to each lane, the number of reads mapped to the genome, the number of reads mapped to either autosomal or sex chromosomes, the number mapped within Ensembl genes, and the number mapped to exons in the Ensembl database (version 48).

| Tissue | # mapped to exons<br>within a gene | # mapped to<br>adjacent exons | # mapped to non-<br>adjacent exons | # conventional<br>splicing events with<br>> 1X coverage | # exon-skipping<br>events with > 1X<br>coverage |
|--------|------------------------------------|-------------------------------|------------------------------------|---------------------------------------------------------|-------------------------------------------------|
| Kidney | 239,699                            | 237,071                       | 2,628                              | 35,325                                                  | 1,364                                           |
| Liver  | 167,317                            | 165,683                       | 1,634                              | 16,969                                                  | 634                                             |

Supplementary Table 4: For each tissue, we show the number of non-aligned sequence reads (NoHits) that align to the 3' end of one exon and the 5' end of another exons from the Exon-Edge Database (EEDB).

| Liver       |          |            |
|-------------|----------|------------|
|             | No genes | Percentage |
| Five Lanes  | 20080    | 100        |
| Four Lanes  | 19695    | 97.9       |
| Three Lanes | 19170    | 95.5       |
| Two Lanes   | 18390    | 91.6       |
| One Lane    | 16973    | 84.5       |

  

| Kidney      |          |            |
|-------------|----------|------------|
|             | No genes | Percentage |
| Five Lanes  | 20921    | 100        |
| Four Lanes  | 20552    | 98.2       |
| Three Lanes | 20064    | 96.0       |
| Two Lanes   | 19355    | 92.5       |
| One Lane    | 18080    | 86.4       |

Supplementary Table 5: The number of genes mapped to by at least one read as a function of the number of lanes analyzed. For the liver sample, to determine the number of genes mapped to by at least one read when four, three, two or one lane was used, we took the average number of genes mapped to by all permutations of four lanes chosen from five, three lanes chosen from five, two lanes chosen from five and one lane chosen from five respectively. The kidney sample was analyzed similarly.
